# Supplementary material for: High accuracy gene expression profiling of sorted cell subpopulations from breast cancer PDX model tissue
Source: PubMed Central journal article supplement (PMC7482927; doi:10.1371/journal.pone.0238594), 2020-09-10
Supplement: pone.0238594.s002.pdf [file pone.0238594.s002.pdf]

Pre-Sort Total Tumor Suspension

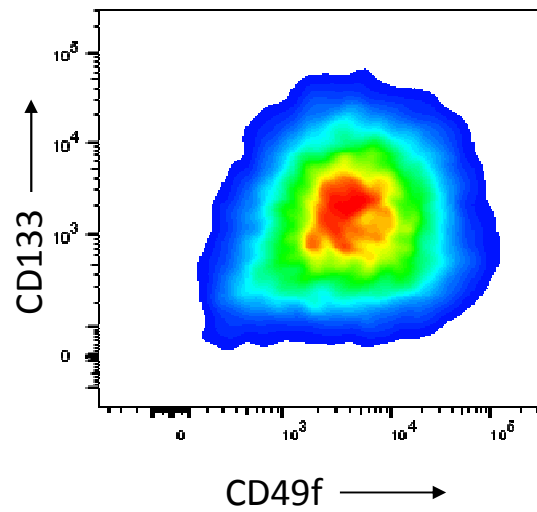

Overlay of Post-Sort Samples for Expression Analysis

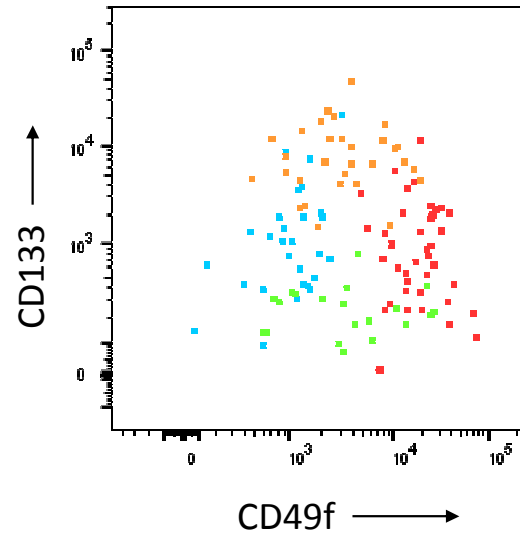

|   | Sample Name                  | Subset Name | Count |
|---|------------------------------|-------------|-------|
| ■ | T290_CD133 Low post_016.fcs  | Tumor Cells | 20.0  |
| ■ | T290_CD133 High post_017.fcs | Tumor Cells | 30.0  |
| ■ | T290_CD49f Low post_014.fcs  | Tumor Cells | 29.0  |
| ■ | T290_CD49f High post_015.fcs | Tumor Cells | 41.0  |
