# Supplementary material for: High accuracy gene expression profiling of sorted cell subpopulations from breast cancer PDX model tissue
Source: PubMed Central journal article supplement (PMC7482927; doi:10.1371/journal.pone.0238594), 2020-09-10
Supplement: pone.0238594.s003.pdf [file pone.0238594.s003.pdf]

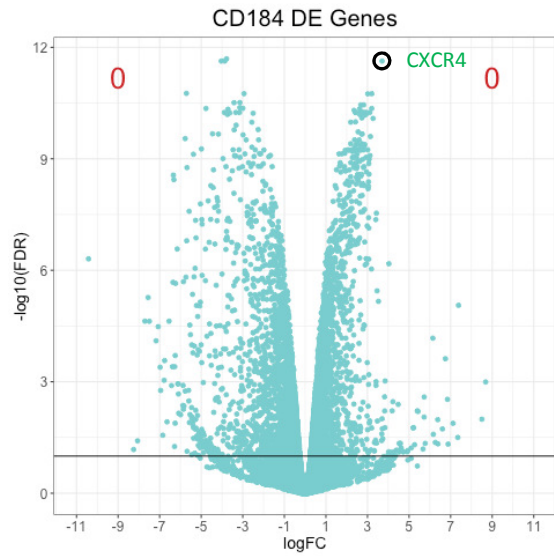

|   | gene         | logFC | FDR     | x-fold |
|---|--------------|-------|---------|--------|
| 1 | KRT15        | -3.8  | 2.0E-12 | 13.7   |
| 2 | <i>CXCR4</i> | 3.7   | 2.3E-12 | 13.0   |
| 3 | KRT17        | -3.9  | 2.3E-12 | 14.6   |
| 4 | KRT81        | -4.0  | 2.3E-12 | 16.4   |
| 5 | AHNAK        | -5.7  | 1.7E-11 | 52.4   |

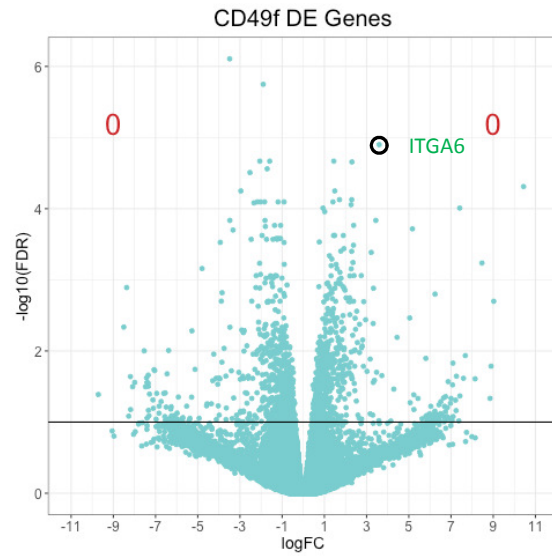

|   | gene         | logFC | FDR     | x-fold |
|---|--------------|-------|---------|--------|
| 1 | NTRK2        | -3.5  | 7.8E-07 | 11.2   |
| 2 | HK2          | -1.9  | 1.8E-06 | 3.7    |
| 3 | <i>ITGA6</i> | 3.6   | 1.3E-05 | 12.1   |
| 4 | ALPL         | -2.1  | 2.1E-05 | 4.2    |
| 5 | CPT1A        | 1.4   | 2.1E-05 | 2.7    |

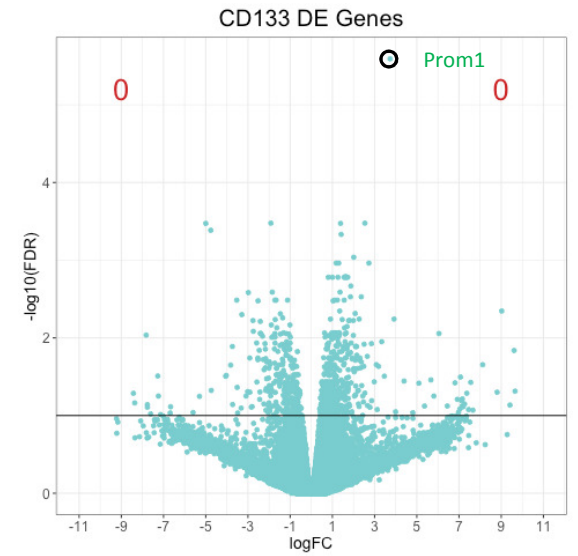

|   | gene          | logFC | FDR     | x-fold |
|---|---------------|-------|---------|--------|
| 1 | <i>PROM1</i>  | 3.7   | 2.6E-06 | 13.3   |
| 2 | ZNF385C       | -1.9  | 3.3E-04 | 3.8    |
| 3 | <i>CXCL12</i> | 2.5   | 3.3E-04 | 5.8    |
| 4 | COL2A1        | -5.0  | 3.4E-04 | 32.0   |
| 5 | CNN2          | 1.4   | 3.4E-04 | 2.6    |
