# Supplementary material for: High accuracy gene expression profiling of sorted cell subpopulations from breast cancer PDX model tissue
Source: PubMed Central journal article supplement (PMC7482927; doi:10.1371/journal.pone.0238594), 2020-09-10
Supplement: pone.0238594.s004.pdf [file pone.0238594.s004.pdf]

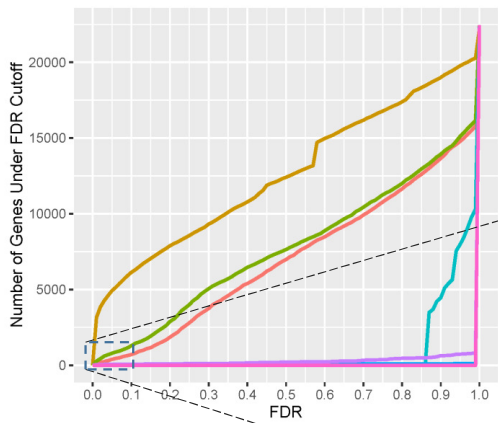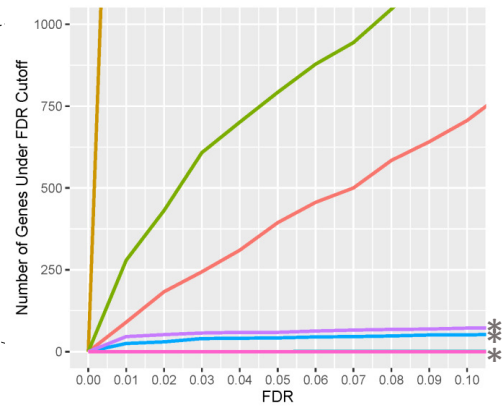

#### Comparison

- CD133 High vs Low
- CD184 High vs Low
- CD49f High vs Low

- Human Only vs Unsorted 0Hr\*
- Human Only vs Unsorted 3Hr\*
- Tissue vs Unsorted 0Hr\*
- Tissue vs Unsorted 3Hr\*
- Unsorted 3Hr vs 0Hr\*

\*Process related changes
