# Supplementary material for: High accuracy gene expression profiling of sorted cell subpopulations from breast cancer PDX model tissue
Source: PubMed Central journal article supplement (PMC7482927; doi:10.1371/journal.pone.0238594), 2020-09-10

Min2015G64

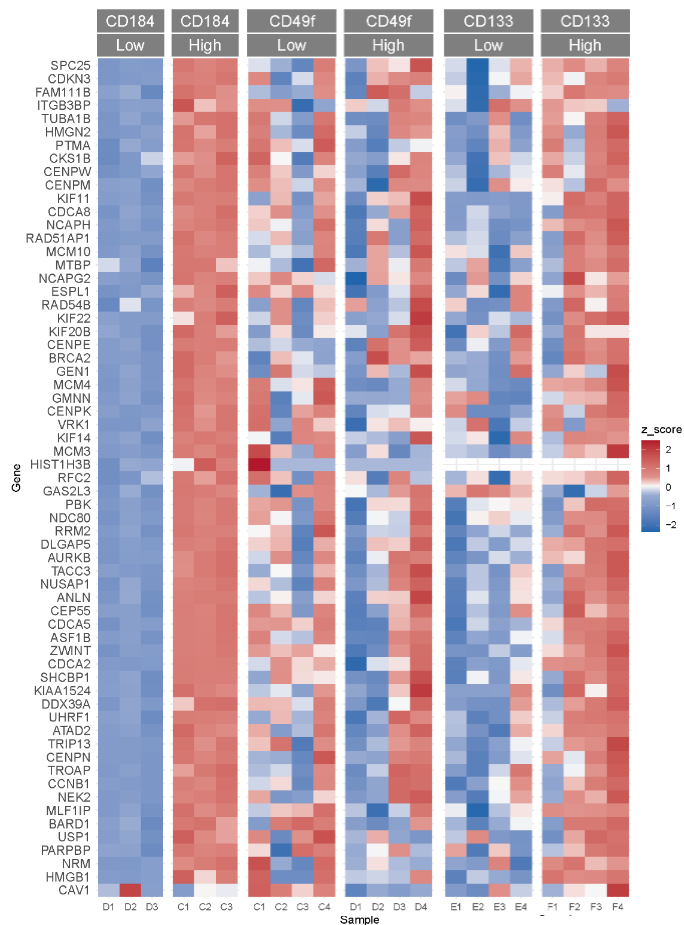

Hassan2017PARPi

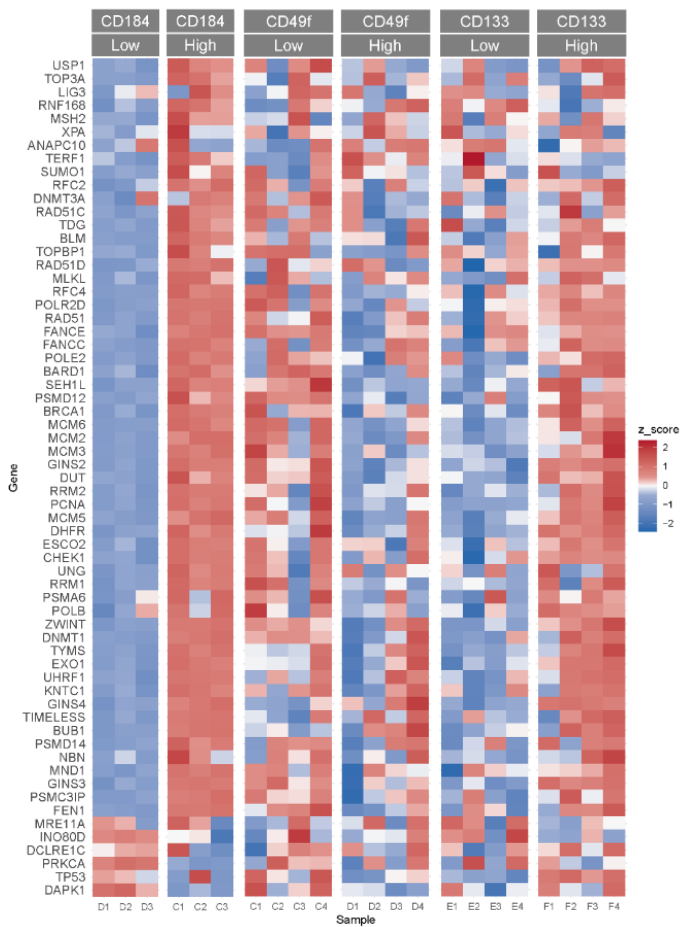

Supplement: pone.0238594.s010.pdf [file pone.0238594.s010.pdf]
